# Supplementary material for: Perfluorocyclobutyl-containing transparent polyimides with low dielectric constant and low dielectric loss
Source: Royal Society of Chemistry journal article supplement (doi:10.1039/d2py00550f), 2022-01-01
Supplement: d2py00550f1.pdf [file d2py00550f1.pdf]

## Perfluorocyclobutyl-containing transparent polyimides with low dielectric constant and low dielectric loss

Weifeng Peng<sup>a</sup>, Huanyu Lei<sup>a</sup>, Luhao Qiu<sup>a</sup>, Feng Bao<sup>a</sup> and Mingjun Huang<sup>a,b\*</sup>

<sup>1</sup> South China Advanced Institute for Soft Matter Science and Technology, School of Emergent Soft Matter, South China University of Technology, Guangzhou 510640, China.

<sup>2</sup> Guangdong Provincial Key Laboratory of Functional and Intelligent Hybrid Materials and Devices, South China University of Technology, Guangzhou 510640, China

Corresponding to: huangmj25@scut.edu.cn (M.H.)

### Experimental Materials

4,4'-(hexafluoroisopropylidene)diphthalic anhydride (6FDA), 4-hydroxyphthalic acid, 1,2-dibromo-1,1,2,2-tetrafluoroethane and N-(4-hydroxyphenyl)acetamide were purchased from Bidepharm Co., Ltd. Bis(trifluoromethyl)-4,4'-Diaminobiphenyl (TFMB), m-cresol and other solvents were obtained from Energy Chemical Co., Ltd. M-cresol was treated by P<sub>2</sub>O<sub>5</sub>, followed by solvent distillation under reduced pressure. Zinc powder was obtained from Aladdin reagent Co., Ltd and activated by 1M hydrochloric acid. All other chemical solvents were used as received.

### Synthesis of 5,5'-((perfluorocyclobutane-1,2-diyl)bis(oxy))bis(isobenzofuran-1,3-dione) (PFODPA)

#### Dimethyl 4-hydroxyphthalate

4-Hydroxyphthalic acid was (30 g of 0.16 mol) dissolved in 300 mL anhydrous methanol, then thionyl chloride (36 mL (0.247 mol)) was added dropwise at 0 °C under nitrogen atmosphere. The reaction mixture was warmed to room temperature and stirred for 20 hours. The solvent was removed under reduced pressure, the crude product was dissolved in ethyl acetate and washed with saturated NaHCO<sub>3</sub>. The white solid (32 g 93%) was obtained after removing the ethyl acetate using rotary evaporation. <sup>1</sup>HNMR (500 MHz, DMSO- *d*<sub>6</sub>) δ 3.72 (s, 3H), 3.74 (s, 3H), 6.88 (dd, 2H), 7.64 (d, 1H), 10.58 (s, 1H). <sup>13</sup>CNMR (500 MHz, *d*<sub>6</sub>-DMSO) δ 166.44, 150.58, 134.72, 131.95, 130.44, 124.89, 122.11, 116.32, 113.31, 53.61.

#### Dimethyl 4-(2-bromo-1,1,2,2-tetrafluoroethoxy)phthalate

Dimethyl 4-(2-bromo-1,1,2,2-tetrafluoroethoxy)phthalate was prepared via fluoroalkylation reaction of dimethyl 4-hydroxyphthalate 2. Dimethyl 4-hydroxyphthalate (30 g, 0.143 mol) and cesium carbonate (50 g, 1.68 mol) were added to a 250 mL dried two-neck round-bottom flask fitted with a constant pressure dropping funnel under nitrogen atmosphere. Then 150 mL dried DMSO was added and stirred for 1h at room temperature. After that, 1,2-dibromotetrafluoroethane (73.2 g, 0.284 mol) was dropped slowly, keeping the temperature below 30 °C. The mixture was stirred for 24 h at 50 °C. The resulting mixture was poured into deionized water and extracted by ethyl acetate. The crude product was purified by silica column chromatography using petroleum as eluent. The

yield of dimethyl 4-(2-bromo-1,1,2,2-tetrafluoroethoxy) phthalate was 76% (42g). <sup>1</sup>HNMR (500 MHz, d<sub>6</sub>-DMSO) δ 3.80 (s, 3H), 3.82 (s, 3H), 7.62 (m, 2H), 7.87 (m, 1H). <sup>19</sup>FNMR (500 MHz, DMSO-*d*<sub>6</sub>) δ -85.43, -70.34. <sup>13</sup>CNMR (500 MHz, d<sub>6</sub>-DMSO) δ 167.47, 165.96, 156.37, 149.55, 147.09, 144.79, 136.23, 135.76, 134.21, 132.74, 127.90, 118.62, 116.09, 53.44.

#### **Dimethyl 4-((1,2,2-trifluorovinyl) oxy)phthalate**

Newly activated zinc powder (5.05 g, 0.077mol) was added to a pre-dried two-neck round-bottom, dry acetonitrile (80 mL) was added and the mixture was heated to reflux. Then Dimethyl 4-(2-bromo-1,1,2,2-tetrafluoroethoxy) phthalate 3 (25 g, 0.064 mol) was dropped slowly into the mixture, keeping the mixture boiling slightly. The mixture keep reflux for 24 h. After the mixture cooled to room temperature, the mixture was filtered, and the solid salt was washed with ethyl acetate. The organic solution was evaporated and purified by silica column chromatography using petroleum as eluent. Colorless oil was obtained and yield 86% (16 g). <sup>1</sup>HNMR (500 MHz, d<sub>6</sub>-DMSO) δ 3.79 (s, 3H), 3.81 (s, 3H), 7.54-7.59 (m, 2H), 7.87 (d, 1H). <sup>19</sup>FNMR (500 MHz, DMSO-*d*<sub>6</sub>) δ -135.55, -124.54, -116.73. <sup>13</sup>CNMR (500 MHz, d<sub>6</sub>-DMSO) δ 166.44, 153.83, 135.20, 132.42, 129.17, 120.84, 118.39, 115.06-105.78 (m), 53.44.

#### **Tetramethyl 4,4'-((perfluorocyclobutane-1,2-diyl) bis(oxy))diphthalate**

Dimethyl 4-((1,2,2-trifluorovinyl) oxy) phthalate (16 g, 0.055 mol) was placed in glass tube, distilled and degassed. The reaction was heated to 185 °C for 24 h. The tetramethyl 4,4'-((perfluorocyclobutane-1,2-diyl) bis(oxy))diphthalate was obtained and yield 96% (15.3 g). <sup>1</sup>HNMR (500 MHz, d<sub>6</sub>-DMSO) δ 3.78 (d, 6H), 3.80 (d, 6H), 7.48-7.55 (m, 4H), 7.84-7.87 (dd, 2H). <sup>19</sup>FNMR (500 MHz, DMSO-*d*<sub>6</sub>) δ -131.20 – -127.02 (m).

#### **4,4'-((perfluorocyclobutane-1,2-diyl) bis(oxy))diphthalic acid**

Tetramethyl 4,4'-((perfluorocyclobutane-1,2-diyl) bis(oxy)) diphthalate (15 g) dissolved in DMSO (50 mL), sodium hydroxide aqueous solution (30 mL, 30wt%) were added into flask. The temperature was raised to 100 °C for 12 h. After the mixture cooled to room temperature, the mixture was poured into deionized water. The product was extracted from the water using ethyl acetate. The solution was evaporated, the white solid was obtained and yield 93% (13.4 g). <sup>1</sup>HNMR (500 MHz, d<sub>6</sub>-DMSO) δ 7.39 (m, 4H), 7.80 (m, 4H), 13.29 (s, 4H), <sup>19</sup>FNMR (500 MHz, DMSO-*d*<sub>6</sub>) δ -131.41 – -126.72 (m). <sup>13</sup>CNMR (500 MHz, d<sub>6</sub>-DMSO) δ 167.95, 153.59, 136.47, 132.18, 130.44, 120.61, 118.39, 113.82-105.51 (m).

#### **5,5'-((perfluorocyclobutane-1,2-diyl)bis(oxy))bis(isobenzofuran-1,3-dione) (PFODPA)**

4,4'-((perfluorocyclobutane-1,2-diyl)bis(oxy))diphthalic acid (13 g) was added to a 100 mL two-necked flask. Acetic anhydride (30 mL) was added, keeping the mixture reflux for 5 h under nitrogen atmosphere. After that, acetic anhydride was removed via vacuum distillation. Then, 4,4'-((perfluorocyclobutane-1,2-diyl)bis(oxy))diphthalic acid was purified by sublimation in vacuum gives amorphous solid powder. The yield was 95% (12 g). <sup>1</sup>HNMR (500 MHz, d<sub>6</sub>-DMSO) δ 7.78-7.84 (m, 2H), 7.86 (m, 2H), 8.14-8.19 (m, 2H). <sup>19</sup>FNMR (500 MHz, DMSO-*d*<sub>6</sub>) δ -131.51 – -126.94

(m).  $^{13}\text{C}$ NMR (500 MHz,  $d_6$ -DMSO)  $\delta$  162.56, 157.01, 134.96, 129.32, 128.71, 125.64, 114.74, 113.42-104.56 (m).

#### **Synthesis of 4,4'-(((perfluorocyclobutane-1,2-diyl)bis(oxy))dianiline (PFODA)**

##### **N-(2-bromo-1,1,2,2-tetrafluoroethoxy)phenyl)acetamide**

N-(2-bromo-1,1,2,2-tetrafluoroethoxy)phenyl)acetamide was prepared via fluoroalkylation reaction of N-(4-hydroxyphenyl)acetamide. N-(4-hydroxyphenyl)acetamide (30 g, 0.2mol) and cesium carbonate (97.5 g, 0.3mol) were added to a 250 mL two-necked round-bottom flask fitted with a constant pressure dropping funnel flask. Then 150 mL dried DMSO was added and stirred for 1h at room temperature. After that, 1,2-dibromotetrafluoroethane (103.2 g, 0.4 mol) was dropped slowly, keeping the temperature below 30 °C. The mixture was stirred for 24 h at 50 °C. The resulting mixture was poured into deionized water and extracted by ethyl acetate. The crude product was purified by silica column chromatography using ethyl acetate/petroleum as eluent. The yield of N-(2-bromo-1,1,2,2-tetrafluoroethoxy)phenyl)acetamide was 61% (40 g).  $^1\text{H}$ NMR (500 MHz,  $d_6$ -DMSO)  $\delta$  2.02 (s, 3H), 7.21 (d, 2H), 7.64 (m, 2H), 10.9 (s, 1H),  $^{19}\text{F}$ NMR (500 MHz, DMSO- $d_6$ )  $\delta$  -85.39, -70.  $^{13}\text{C}$ NMR (500 MHz, DMSO- $d_6$ )  $\delta$  169.22, 143.52, 139.04, 122.43, 120.61, 116.32, 113.31, 24.73.

##### **N-(4-((1,2,2-trifluorovinyl)oxy)phenyl)acetamide**

Newly activated zinc powder (17.3 g, 0.264mol) was added to a pre-dried two-neck round-bottom, dry acetonitrile (150 mL) was added and the mixture was heated to reflux. Then N-(2-bromo-1,1,2,2-tetrafluoroethoxy)phenyl)acetamide (40 g, 0.12 mol) was dropped slowly into the mixture, keeping the mixture boiling slightly. The mixture keep reflux for 24 h. After the mixture cooled to room temperature, the mixture was filtered, and the solid salt was washed with ethyl acetate. The organic solution was evaporated and purified by silica column chromatography using ethyl acetate/petroleum as eluent. Colorless oil was obtained and yield 75% (20.8 g).  $^1\text{H}$ NMR (500 MHz,  $d_6$ -DMSO)  $\delta$  1.94 (s, 3H), 7.17 (m, 2H), 7.61 (m, 2H),  $^{19}\text{F}$ NMR (500 MHz, DMSO- $d_6$ )  $\delta$  -133.7, -127.4, -119.51.  $^{13}\text{C}$ NMR (500 MHz, DMSO- $d_6$ )  $\delta$  168.74, 149.87, 143.76, 138.53, 134.48, 120.61, 24.18.

##### **N,N'-(((perfluorocyclobutane-1,2-diyl)bis(oxy))bis(4,1-phenylene))diacetamide**

N-(4-((1,2,2-trifluorovinyl)oxy)phenyl)acetamide (20 g, 0.086 mol) was placed in glass tube, distilled and degassed. The reaction was heated to 185 °C for 24 h. The N, N'-(((perfluorocyclobutane-1,2-diyl)bis(oxy))bis(4,1-phenylene))diacetamide was obtained and yield 85% (16.8 g).  $^1\text{H}$ NMR (500 MHz,  $d_6$ -DMSO)  $\delta$  1.98 (s, 6H), 3.80 (d, 6H), 7.13 (m, 4H), 7.58 (m, 4H), 10.2 (s, 2H).  $^{19}\text{F}$ NMR (500 MHz, DMSO- $d_6$ )  $\delta$  -131.61 – -127.79 (m).  $^{13}\text{C}$ NMR (500 MHz, DMSO- $d_6$ )  $\delta$  168.74, 147.57, 137.73, 121.16, 119.34, 114-106 (m), 24.97.

##### **4,4'-(((perfluorocyclobutane-1,2-diyl)bis(oxy))dianiline (PFODA)**

N,N'-(((perfluorocyclobutane-1,2-diyl)bis(oxy))bis(4,1-phenylene))diacetamide (15 g) dissolved in DMSO (50 mL), sodium hydroxide aqueous solution (30 mL, 30wt%) were added into flask. The

temperature was raised to 100 °C for 12 h. After the mixture cooled to room temperature, the mixture was poured into deionized water. The product was extracted from the water using ethyl acetate. The solution was evaporated, the white solid was obtained and yield 91% (11.2 g). The isomers were separated by silica column chromatography using ethyl acetate/petroleum (1:3) as eluent. PFODA-*trans* <sup>1</sup>HNMR (500 MHz, d<sub>6</sub>-DMSO) δ 5.09 (s, 4H), 6.51 (m, 4H), 6.85 (d, 4H), <sup>19</sup>FNMR (500 MHz, DMSO-*d*<sub>6</sub>) δ -130.35, -129.88, -128.64, -128.37, -128.16, <sup>13</sup>CNMR (500 MHz, DMSO-*d*<sub>6</sub>) δ 106-113 (m), 114.81, 120.23, 142.45, 147.33. PFODA-*cis* <sup>1</sup>HNMR (500 MHz, d<sub>6</sub>-DMSO) δ 5.13 (s, 4H), 6.51 (m, 4H), 6.86 (d, 4H), <sup>19</sup>FNMR (500 MHz, DMSO-*d*<sub>6</sub>) δ -130.91, -130.43, -129.39, -129.10, -128.61, <sup>13</sup>CNMR (500 MHz, DMSO-*d*<sub>6</sub>) δ 147.50, 142.20, 120.36, 114.90, 106-113 (m).

### Synthesis of polyimides

Perfluorocyclobutyl-containing polyimides were synthesized via traditional one-step polycondensation. 6FDA-PFODA was chosen as an example. PFODA (0.58 g, 1.67 mmol) was added into a 100 mL two-necked round bottom flask and dissolved in 5 mL *m*-cresol. After the diamine completely dissolved, PFODPA (0.6811 g, 1.67 mmol) was added to the bottle. The mixture was stirred for 1 h at 80 °C, then 185 °C for 12 h. After the temperature drops to room temperature, the mixture was poured into 250 mL methanol to give fibrous precipitate and washed with methanol for three times. Then the polyimide was dried under vacuum at 150 °C for 12 h. The other polyimides were prepared by similar process as describe above.

### Prepared of polyimide films

The polyimide powder was dissolved in anhydrous DMAc with a solid content of 15 wt%. Then the solution was casted on glass substrate, the solution was heating at 80 °C for 2 h, 150 °C for 2h, 200°C for 2h and 220 °C for 2h. After that, the films were immersed into deionized water to peeled from the substrates and dried at 100 °C for 12 h.

### Characterization

<sup>1</sup>H, <sup>13</sup>C and <sup>19</sup>F NMR spectra were carried on a Bruker 400 (400 MHz) instrument, deuterated dimethyl sulfoxide was chosen to dissolve samples using tetramethylsilane as internal reference. LC-MS was conducted on a Bruker Agilent 1100 using acetonitrile as the solvent. Gel permeation chromatography (GPC) analysis was performed on a WATERS 2695 at a flow rate of 1 mL min<sup>-1</sup> using polystyrenes as standard. DMF/LiBr solution (0.05 M of LiBr) was used as the eluent. Elemental analysis were determined by an elemental analyser (Vario EL cube). Intrinsic viscosities ([η]) of the PI were measured with an ubbelohde viscometer at 30 °C in DMAc at a concentration of 0.5 g/dL. Fourier-transform infrared spectroscopy spectra (32 accumulated scans at a resolution of 4 cm<sup>-1</sup> in the range of 4000-400 cm<sup>-1</sup> wavenumber range) were recorded on a Bruker Vector 33 FT-IR spectrometer by attenuated total reflection infrared (ATR-IR) mode. Wide-angle X-ray diffraction (WAXD) was carried out on a Homo Lab (Rigaku, Japan) X-ray diffractometer using Cu Kα radiation, 2θ ranging from 5° to 40°. Differential scanning calorimetry (DSC) were

performed on a TA instrument DSC 2500 under nitrogen atmosphere ( $50 \text{ mL min}^{-1}$ ) at a heating rate of  $10 \text{ }^{\circ}\text{C min}^{-1}$ . Thermogravimetric analysis (TGA) was conducted on TA instrument Q800 under nitrogen atmosphere ( $50 \text{ mL min}^{-1}$ ) at a heating rate of  $10 \text{ }^{\circ}\text{C min}^{-1}$  from  $30\text{--}800 \text{ }^{\circ}\text{C}$ . Dynamic Thermomechanical Analyzer (DMA) was recorded on a TA instrument DMA Q800 at a heating rate of  $5^{\circ}\text{C min}^{-1}$  with a load frequency of  $1 \text{ Hz}$  in air atmosphere. Thermomechanical Analyzer (TMA) was carried out on a TA instruments Q 400 analyzer with a static load of  $0.05\text{N}$  at a heating rate of  $5 \text{ }^{\circ}\text{C min}^{-1}$  from  $50^{\circ}\text{C}$  to  $250^{\circ}\text{C}$ . Mechanical properties were measured by a microcomputer controlled electronic universal testing machine (LD22.102, Shanghai) with a strain rate of  $2 \text{ mm min}^{-1}$ . The results were carried out with samples dimensions of  $30 \text{ mm} \times 10 \text{ mm} \times 15 \text{ }\mu\text{m}$ . The optical properties of the films were determined by SHIMADZU UV-3600 plus spectrophotometer (Japan) from  $200 \text{ nm}$  to  $800 \text{ nm}$ . Dielectric properties were recorded using Novocontrol Concept 40 Dielectric/Impedance Spectrometer with frequencies between  $10\text{MHz}$  and  $100 \text{ Hz}$ , the films were sprayed with Au at both sides before the tests, the dielectric properties at  $10 \text{ GHz}$  was performed on a vector network analyzer (Japan). Water absorption was measured via the weight change of the films before and after immersed in deionized water for  $72 \text{ h}$  at room temperature. Water contact angles were recorded on a Contact Angle Meter (JC2000D1, Shanghai). The structural optimization of monomers and polymers was achieved by Density Functional Theory (DFT), B3LYP/6-31G (2d, p) with the Gaussian 09 program. Dipole moment ( $\mu$ ), polarizability ( $\alpha$ ), and volume were calculated by DFT (CAM-B3LYP/6-311++g(d,p)).

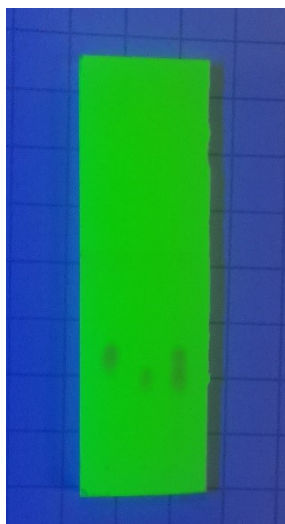

Figure S1 TLC (thin-layer chromatography) photograph of PFODA and its isomers;  
PFODA-trans (left), PFODA-cis (middle), PFODA mixture (right).

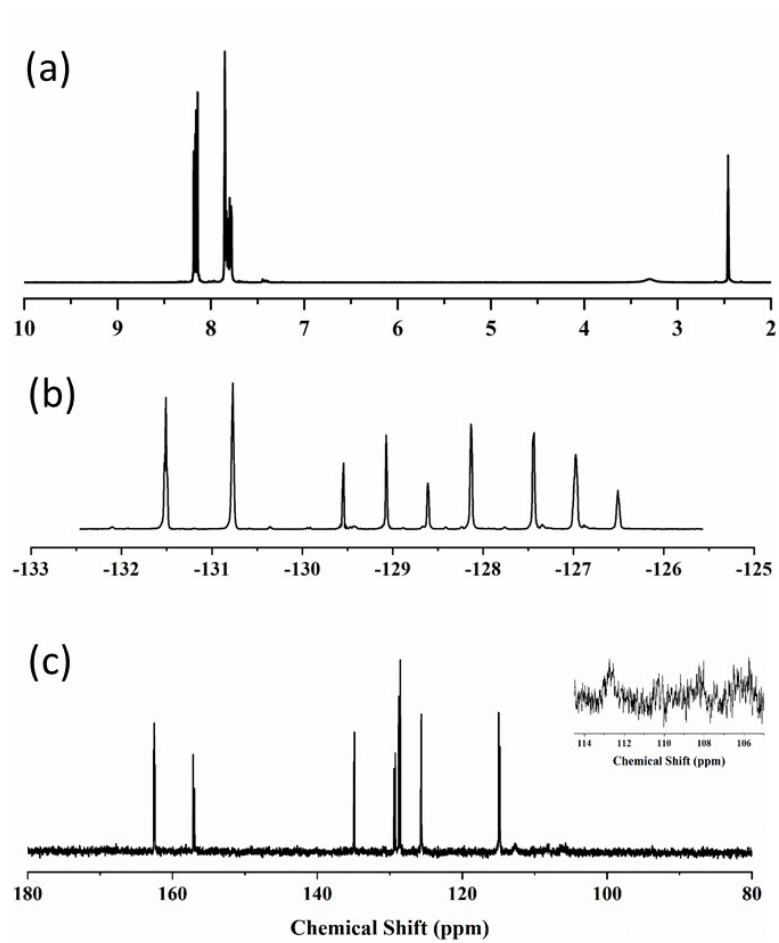

Figure S2 a)  $^1\text{H}$ NMR spectra of PFODPA; b)  $^{13}\text{C}$ NMR spectra of PFODPA;  $^{19}\text{F}$ NMR spectra of PFODPA

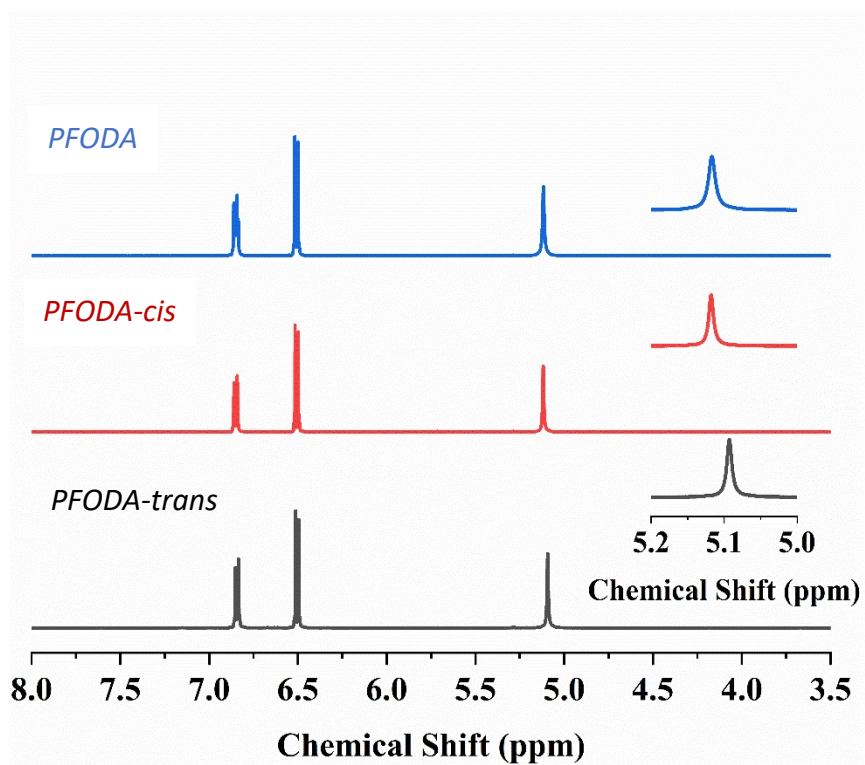

Figure S3 <sup>1</sup>H NMR spectra of PFODA and its isomers

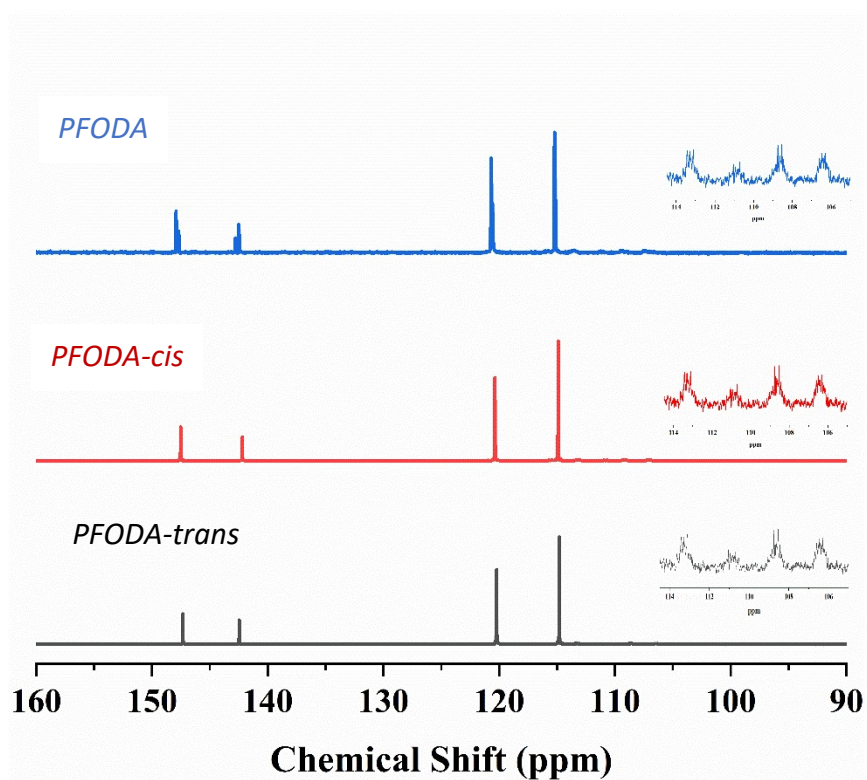

Figure S4  $^{13}\text{C}$  NMR spectra of PFODA and its isomers

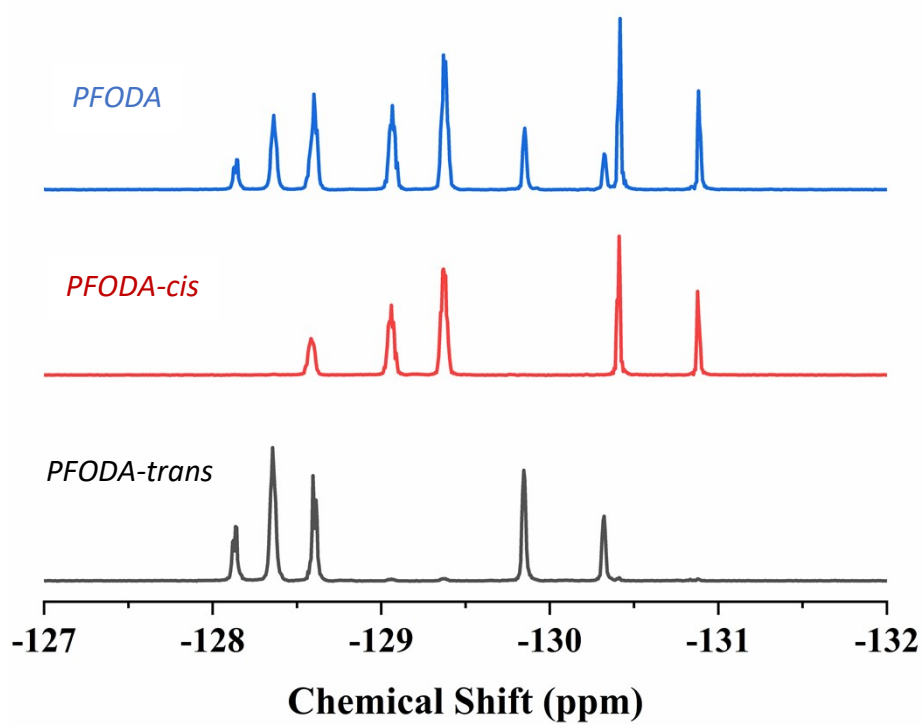

Figure S5  $^{19}\text{F}$ NMR spectra of PFODA and its isomers

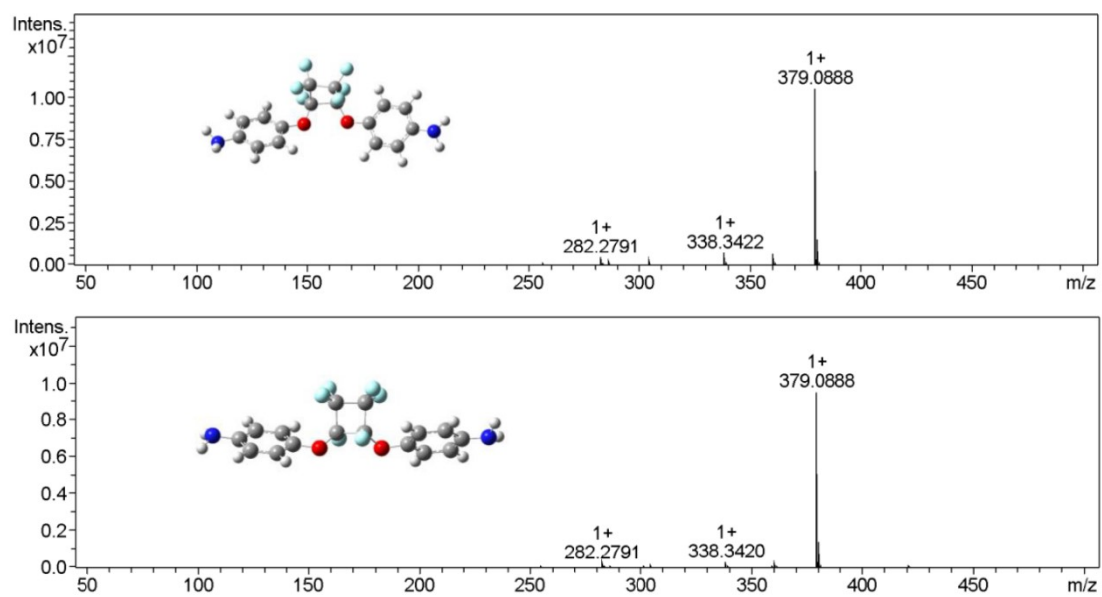

Figure S6 LC-MS of PFODA-trans and PFODA-cis

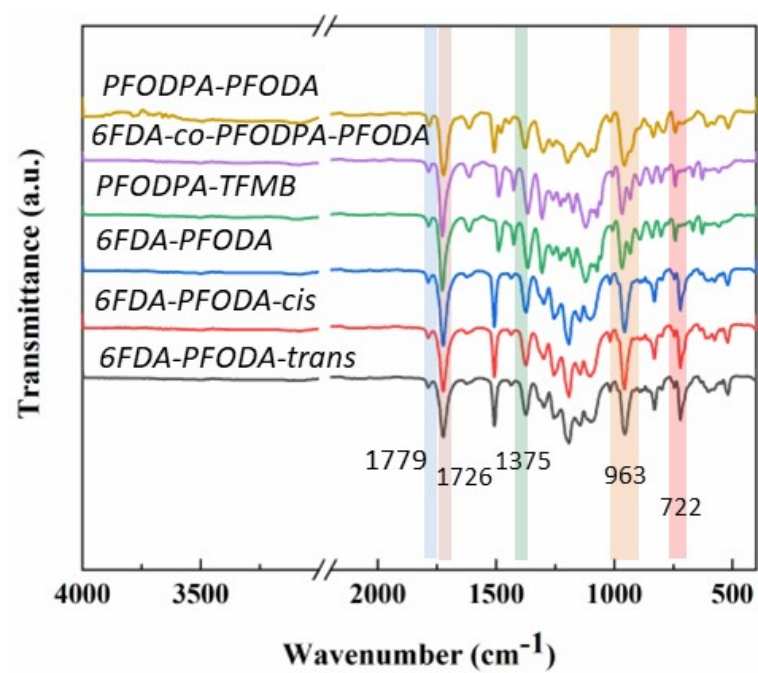

Figure S7 FT-IR spectra of polyimides

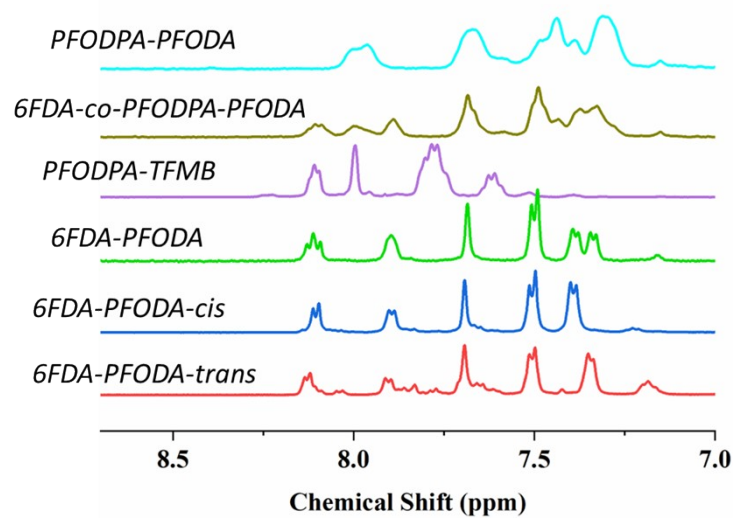

Figure S8 <sup>1</sup>H NMR spectra of polyimides

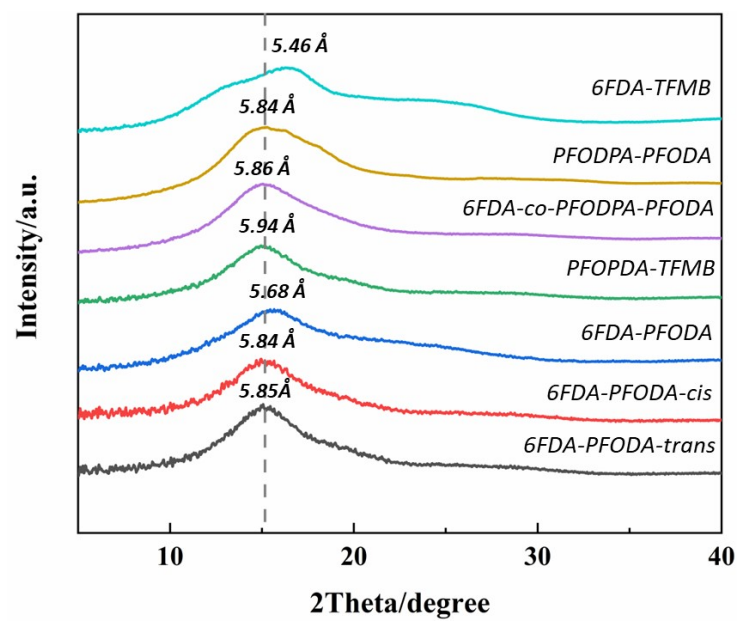

Figure S9 The WAXD patterns of polyimide films

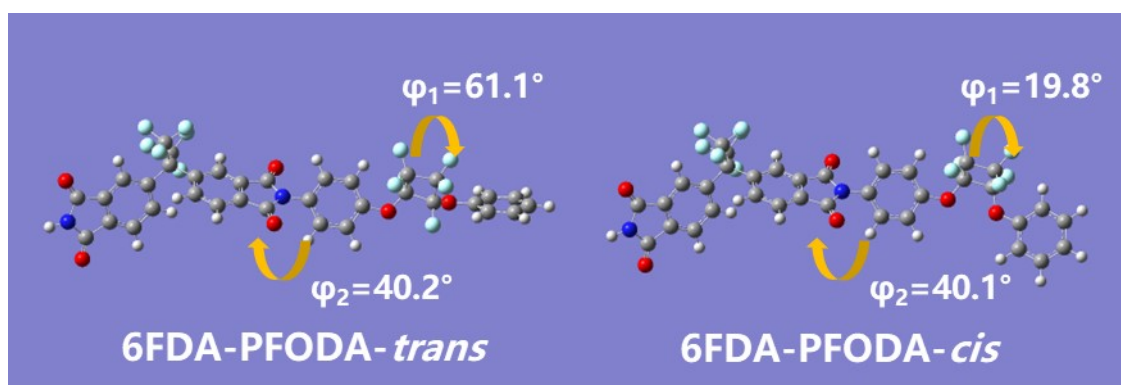

Figure S10 The optimized geometries of the 6FDA-PFODA-*trans* and 6FDA-PFODA-*cis* units

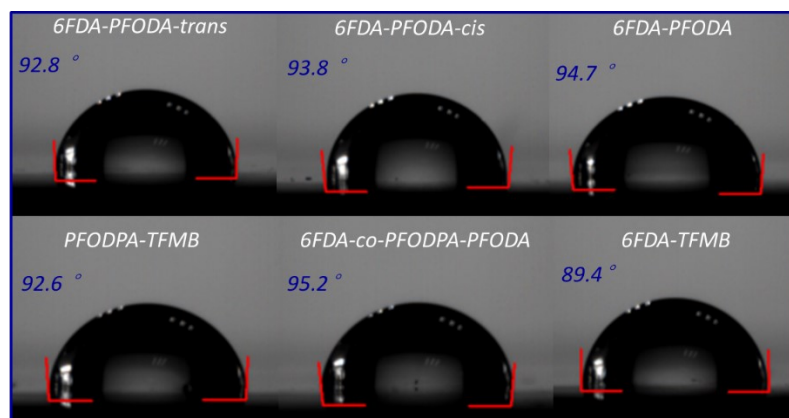

Figure S11 Water contact angles of polyimides

Table S1 Isomers conformation of PFODPA and PFODA and its lowest energy state

| Dianhydride                                                                       | Energy/hatree |
|-----------------------------------------------------------------------------------|---------------|
| 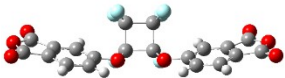 | -1966.55      |
| 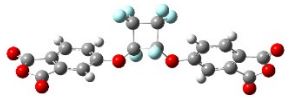 | -1966.55      |
| <b>Diamine</b>                                                                    |               |
| 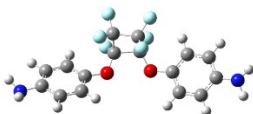 | -1475.85      |
| 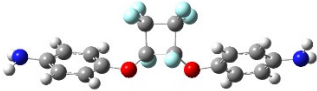 | -1475.85      |

Table S2 GPC and intrinsic viscosity data of polyimides

|                                     | <b>6FDA-<br/>PFODA-<br/><i>trans</i></b> | <b>6FDA-<br/>PFODA-<i>cis</i></b> | <b>6FDA-<br/>PFODA</b> | <b>PFODPA-<br/>TFMB</b> | <b>6FDA-<i>co</i>-<br/>PFODPA-<br/>PFODA</b> | <b>PFODPA-<br/>PFODA</b> |
|-------------------------------------|------------------------------------------|-----------------------------------|------------------------|-------------------------|----------------------------------------------|--------------------------|
| <b>M<sub>n</sub></b>                | <b>48843</b>                             | <b>53988</b>                      | <b>87918</b>           | <b>71883</b>            | <b>35451</b>                                 | <b>20889</b>             |
| <b>M<sub>w</sub></b>                | <b>80239</b>                             | <b>89909</b>                      | <b>162503</b>          | <b>136048</b>           | <b>65228</b>                                 | <b>34054</b>             |
| <b>PDI</b>                          | <b>1.71</b>                              | <b>1.66</b>                       | <b>1.84</b>            | <b>1.89</b>             | <b>1.84</b>                                  | <b>1.64</b>              |
| <b>[<math>\eta</math>]<br/>dL/g</b> | <b>0.69</b>                              | <b>0.75</b>                       | <b>0.92</b>            | <b>0.87</b>             | <b>0.45</b>                                  | <b>0.35</b>              |
| <b><math>\rho(g/cm^3)</math></b>    | <b>1.246</b>                             | <b>1.249</b>                      | <b>1.254</b>           | <b>1.241</b>            | <b>1.235</b>                                 | <b>1.230</b>             |

Table S3 Element analysis data of polyimides

|                | 6FDA-<br>PFODA- <i>trans</i>                                                  | 6FDA-<br>PFODA- <i>cis</i>                                                    | 6FDA-<br>PFODA                                                                | PFODPA-<br>TFMB                                                               | 6FDA- <i>co</i> -<br>PFODPA-<br>PFODA                                          | PFODPA-<br>PFODA                                                              |
|----------------|-------------------------------------------------------------------------------|-------------------------------------------------------------------------------|-------------------------------------------------------------------------------|-------------------------------------------------------------------------------|--------------------------------------------------------------------------------|-------------------------------------------------------------------------------|
| Repeat unit    | C <sub>35</sub> H <sub>16</sub> F <sub>12</sub> N <sub>2</sub> O <sub>6</sub> | C <sub>35</sub> H <sub>16</sub> F <sub>12</sub> N <sub>2</sub> O <sub>6</sub> | C <sub>35</sub> H <sub>16</sub> F <sub>12</sub> N <sub>2</sub> O <sub>6</sub> | C <sub>35</sub> H <sub>14</sub> F <sub>12</sub> N <sub>2</sub> O <sub>8</sub> | C <sub>70</sub> H <sub>30</sub> F <sub>24</sub> N <sub>4</sub> O <sub>14</sub> | C <sub>36</sub> H <sub>15</sub> F <sub>12</sub> N <sub>2</sub> O <sub>8</sub> |
| C (Calculated) | 55.65                                                                         | 56.69                                                                         | 55.44                                                                         | 55.01                                                                         | 55.4                                                                           | 53.8                                                                          |
| C (Found)      | 53.40                                                                         | 53.40                                                                         | 53.40                                                                         | 53.20                                                                         | 52.30                                                                          | 52.00                                                                         |
| H (Calculated) | 2.21                                                                          | 2.43                                                                          | 2.05                                                                          | 1.86                                                                          | 1.99                                                                           | 1.83                                                                          |
| H (Found)      | 2.03                                                                          | 2.03                                                                          | 2.03                                                                          | 1.73                                                                          | 1.86                                                                           | 1.81                                                                          |
| N (Calculated) | 3.56                                                                          | 3.50                                                                          | 3.69                                                                          | 3.76                                                                          | 3.52                                                                           | 3.46                                                                          |
| N (Found)      | 3.56                                                                          | 3.56                                                                          | 3.56                                                                          | 3.47                                                                          | 3.49                                                                           | 3.37                                                                          |

Table S4 The solubility of polyimides

|                                     | 6FDA-<br>PFODA-<br><i>trans</i> | 6FDA-<br>PFODA-<br><i>cis</i> | 6FDA-<br>PFODA | PFODPA-<br>TFMB | 6FDA- <i>co</i> -<br>PFODPA-<br>PFODA | PFODPA-<br>PFODA |
|-------------------------------------|---------------------------------|-------------------------------|----------------|-----------------|---------------------------------------|------------------|
| <b>NMP</b>                          | ++                              | ++                            | ++             | ++              | ++                                    | ++               |
| <b>DMAc</b>                         | ++                              | ++                            | ++             | ++              | ++                                    | ++               |
| <b>DMF</b>                          | ++                              | ++                            | ++             | ++              | ++                                    | ++               |
| <b>DMSO</b>                         | ++                              | ++                            | ++             | ++              | ++                                    | ++               |
| <b>m-cresol</b>                     | ++                              | ++                            | ++             | ++              | ++                                    | ++               |
| <b>Acetone</b>                      | ++                              | ++                            | ++             | ++              | ++                                    | ++               |
| <b>THF</b>                          | ++                              | ++                            | ++             | ++              | ++                                    | ++               |
| <b>CHCl<sub>3</sub></b>             | ++                              | ++                            | ++             | ++              | ++                                    | ++               |
| <b>CH<sub>2</sub>Cl<sub>2</sub></b> | ++                              | ++                            | ++             | ++              | ++                                    | ++               |

(2wt%), ++, dissolve at room temperature.

Table S5 Optical properties of polyimide films

|                                              | Cut<br>off<br>(nm) | <sup>a</sup> T <sub>400</sub><br>(%) | <sup>b</sup> T <sub>550</sub><br>(%) | L*   | a*   | b*   | Haze | n     | Thickness<br>(μm) |
|----------------------------------------------|--------------------|--------------------------------------|--------------------------------------|------|------|------|------|-------|-------------------|
| <b>6FDA-<br/>PFODA-<i>trans</i></b>          | 312                | 73.6                                 | 89.5                                 | 90.8 | -2.0 | 2.1  | 0.42 | 1.558 | 13                |
| <b>6FDA-<br/>PFODA-<i>cis</i></b>            | 311                | 75.8                                 | 88.9                                 | 90.2 | -2.2 | 3.4  | 0.58 | 1.562 | 13                |
| <b>6FDA-<br/>PFODA</b>                       | 334                | 66.8                                 | 88.4                                 | 90.9 | -2.5 | 3.2  | 0.69 | 1.559 | 15                |
| <b>PFODPA-<br/>TFMB</b>                      | 335                | 71.1                                 | 85.7                                 | 90.8 | -1.6 | 1.2  | 1.23 | 1.548 | 17                |
| <b>6FDA-<i>co</i>-<br/>PFODPA-<br/>PFODA</b> | 311                | 68.7                                 | 88.2                                 | 90.1 | -2.0 | 6.8  | 1.44 | 1.545 | 16                |
| <b>6FDA-TFMB</b>                             | 326                | 80.2                                 | 89.8                                 | 92.1 | -1.2 | 1.11 | 0.32 | 1.564 | 15                |

<sup>a</sup>, <sup>b</sup> Optical transmittance at 400 nm and 550 nm. <sup>c</sup> Average transmittance in the range of 400 – 800 nm.
